# Supplementary material for: CEO Pay Ratio Disclosures and Changes in Employee Pay Satisfaction
Source: Atypon-hosted journal article supplement (doi:10.1287/mnsc.2024.08151), 2025-11-13
Supplement: mnsc.2024.08151.sm1.pdf [file mnsc.2024.08151.sm1.pdf]

Internet Appendix for CEO Pay Ratio Disclosures and Changes in  
Employee Pay Satisfaction

Mary Ellen Carter

Lisa LaViers

Jason Sandvik

Da Xu

# A Internet Appendix: Tables and Figures

Figure A.1: Event Period Versus Sample Period

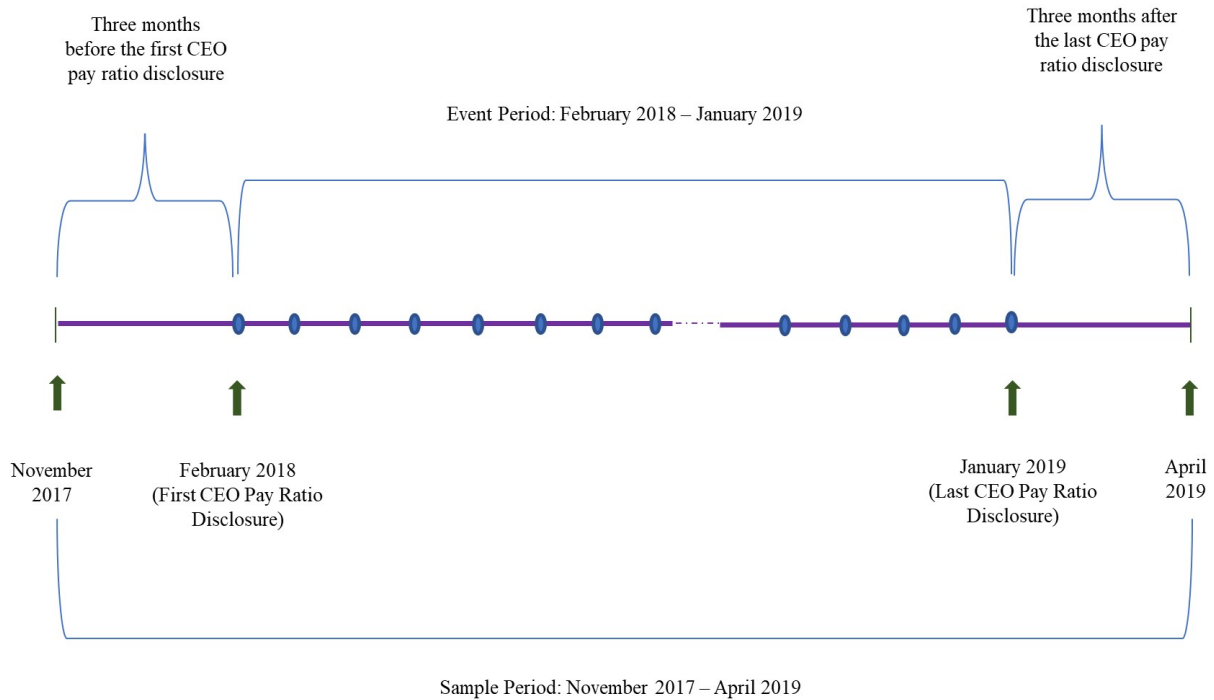

*Notes.* This figure illustrates the distinction between the event period and the sample period. The event period starts in February 2018, when the first CEO pay ratio disclosure is reported, and ends in January 2019, when the last CEO pay ratio disclosure is reported. The sample period accounts for all the Glassdoor data and financial controls used in our regression analysis, which extends from three months before the first CEO pay ratio disclosure is reported to three months after the last CEO pay ratio disclosure is reported.

Figure A.2: Glassdoor Rating Example

**Boeing**

Overview ▾ 16K Reviews 2.1K Jobs 30K Salaries 71 Q&A 3K Interviews 6.6K Benefits 4.4K Diversity

### Employee Review

[See All Reviews \(15509\)](#)

5.0 ★★★★★ ▾ Aug 10, 2023 ...

**Really nice company**

Program Manager  
Current Employee Washington, DC

Recommend  CEO Approval  Business Outlook

**Pros**  
Amazing organization that caters to most people

**Cons**  
Kinda old in a way of doing things

1

Helpful Share

See reviews by: [Popularity](#) | [Rating](#) | [Date](#) | [All](#)

Notes. This figure displays a screenshot of an example Glassdoor review.

Figure A.3: **Within-Firm Variation of Monthly Ratings**

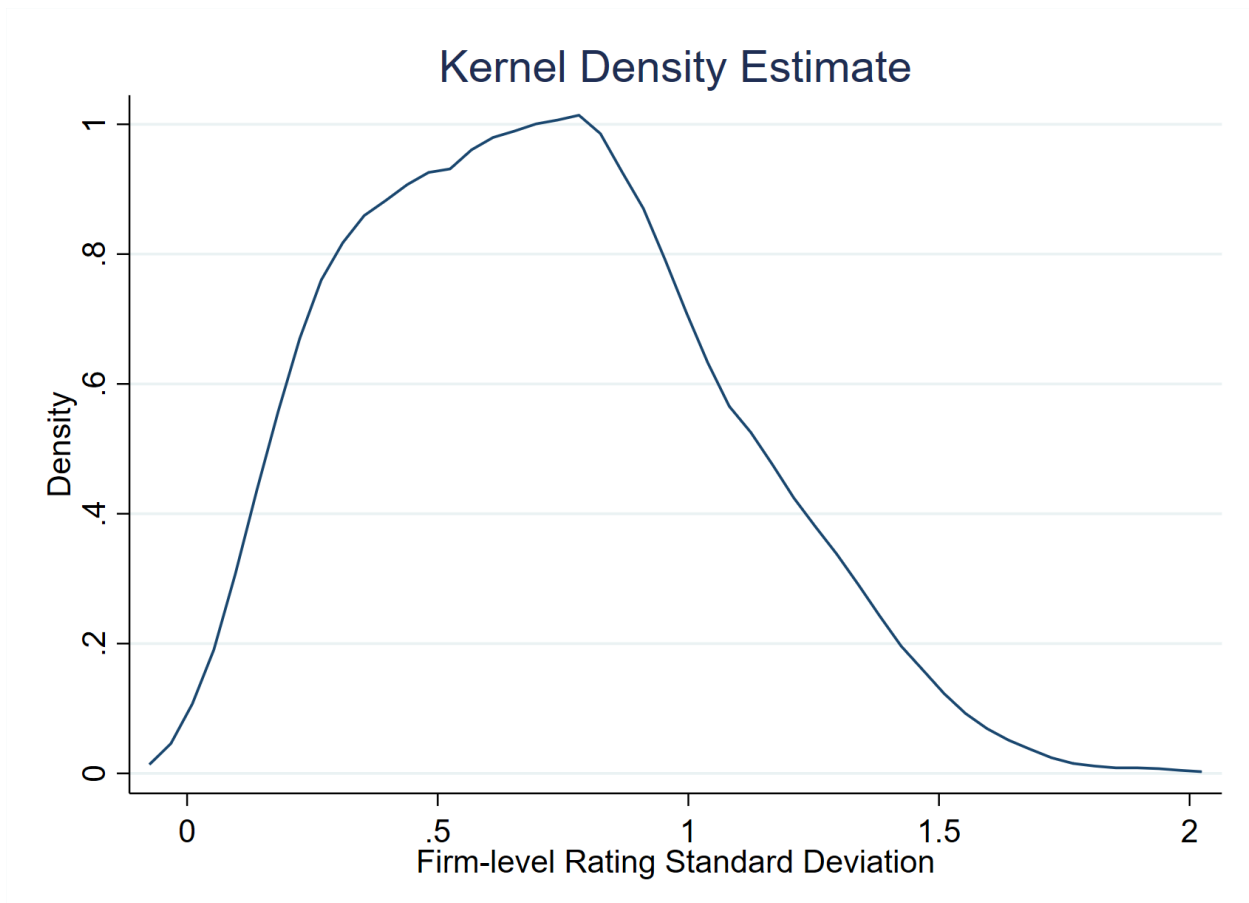

*Notes.* This figure displays the distribution of within-firm variation of monthly average of Compensation-and-Benefits ratings.

Table A.1: Initial Pay Ratio Disclosure Year-Months

|                | Frequency | Percentage | Cumulative Percentage |
|----------------|-----------|------------|-----------------------|
| 2018 February  | 11        | 0.81%      | 0.81%                 |
| 2018 March     | 479       | 35.22%     | 36.03%                |
| 2018 April     | 561       | 41.25%     | 77.28%                |
| 2018 May       | 48        | 3.53%      | 80.81%                |
| 2018 June      | 38        | 2.79%      | 83.60%                |
| 2018 July      | 26        | 1.91%      | 85.51%                |
| 2018 August    | 23        | 1.69%      | 87.21%                |
| 2018 September | 33        | 2.43%      | 89.63%                |
| 2018 October   | 30        | 2.21%      | 91.84%                |
| 2018 November  | 16        | 1.18%      | 93.01%                |
| 2018 December  | 47        | 3.46%      | 96.47%                |
| 2019 January   | 48        | 3.53%      | 100.00%               |
| Total          | 1,360     |            |                       |

*Notes.* This table presents the event year-month distribution of the final sample.

Table A.2: Initial Pay Ratio Disclosure Year-Months

|                                                                          | Number of Firms | Number of Firm-Months |
|--------------------------------------------------------------------------|-----------------|-----------------------|
| Hand-collected initial pay ratio data                                    | 2,237           | N/A                   |
| Expand the firms into firm-months<br>(from Nov. 2017 to Apr. 2019)       | 2,064           | 37,152                |
| Delete firm-months overlapping with<br>next or previous proxy statements | 2,064           | 33,710                |
| Keep firms without missing controls                                      | 2,024           | 32,900                |
| Require at least one rating in both pre-<br>and post-periods             | 1,360           | 22,565                |
| Final sample without missing Compensation-<br>and-Benefits ratings       | 1,360           | 18,647                |
| Alternative samples used in robustness tests                             |                 |                       |
| (1) Staggered regression sample                                          | 1,360           | 43,710                |
| (2) Fixed window sample                                                  | 1,447           | 27,078                |
| (3) Back-filled missing months sample                                    | 1,522           | 24,711                |

*Notes.* This table presents our sample selection. Below the final sample of 1,360 firms and 18,647 firm-months, we also report the three alternative samples that are used in the robustness tests in Table 5.

Table A.3: Variable Definitions

| Variable                         | Variable Definition                                                                                                                    | Data Source                     |
|----------------------------------|----------------------------------------------------------------------------------------------------------------------------------------|---------------------------------|
| <b>Glassdoor:</b>                |                                                                                                                                        |                                 |
| Number of Ratings                | The inverse hyperbolic sine transformation of the number of employee ratings.                                                          | Glassdoor.com                   |
| Compensation-and-Benefits Rating | Monthly average of compensation-and-benefits ratings from Glassdoor.com.                                                               | Glassdoor.com                   |
| Work-Life-Balance Rating         | Monthly average of work-life-balance ratings from Glassdoor.com.                                                                       | Glassdoor.com                   |
| Average Rater Salary             | The average rater pay in a given firm-month, using self-reported data on annualized salaries by Glassdoor participants.                | Proprietary Data from Glassdoor |
| <b>Pay Ratio:</b>                |                                                                                                                                        |                                 |
| Post Disclosure                  | 1 in firm-months if the firm has provided the initial pay ratio, and 0 otherwise.                                                      | DEF-14A                         |
| Low Median Employee Pay          | 1 if the firm has a median employee pay that is below the median value of firms that disclosed before the focal firm, and 0 otherwise. | DEF-14A                         |
| Low CEO Pay                      | 1 if the firm has a CEO pay that is below the median value of firms that disclosed before the focal firm, and 0 otherwise.             | DEF-14A                         |
| <b>Controls:</b>                 |                                                                                                                                        |                                 |
| Log Assets                       | The logarithm of total assets.                                                                                                         | Compustat                       |
| Number of Segments               | The number of operating industries.                                                                                                    | Compustat                       |
| Intangible Assets                | Intangible assets divided by total assets.                                                                                             | Compustat                       |
| Book to Market                   | Book value of equity divided by the market capitalization.                                                                             | Compustat                       |
| Log Firm Age                     | The logarithm of one plus the number of months after the firm first appears in CRSP.                                                   | CRSP                            |

|                          |        |                                                                                                     |                          |
|--------------------------|--------|-----------------------------------------------------------------------------------------------------|--------------------------|
| Log Analyst Coverage     |        | The logarithm of one plus the number of analysts making EPS forecasts for the firm during the year. | IBES                     |
| Institutional<br>holding | Share- | The percentage of the firm's shares owned by institutional investors.                               | Thompson<br>Reuters 13 F |
| Earnings Surprise        |        | Seasonal difference in quarterly earnings before extraordinary items divided by stock price.        | Compustat                |
| Cash Holding             |        | Cash and cash equivalents divided by total assets.                                                  | Compustat                |

---

### Cross-sectional Tests:

|                                   |       |                                                                                                                                                                                                      |                        |
|-----------------------------------|-------|------------------------------------------------------------------------------------------------------------------------------------------------------------------------------------------------------|------------------------|
| Low CEO Pay<br>increase           | In-   | 1 if the CEO pay increase relative to the previous year is below the median value of firms that disclosed before the focal firm, and 0 otherwise.                                                    | Execucomp              |
| Log CEO Pay                       |       | The logarithm of one plus total CEO compensation.                                                                                                                                                    | Execucomp              |
| Log Number of Previous<br>Ratings |       | The logarithm of one plus the number of employee ratings one year before the initial pay ratio disclosures.                                                                                          | Glassdoor.com          |
| Log Previous Media<br>Coverage    | Media | The logarithm of one plus the number of labor-related news articles one year before the initial pay ratio disclosure. We require the relevance score to be 100 and only use flash and full articles. | RavenPack              |
| Log Same-Industry<br>Firms        |       | The logarithm of one plus the number of firms headquartered within 20 miles of the focal firm's headquarters and specialized in the same industry.                                                   | EDGAR/NBER<br>Websites |
| Log Cumulative Peer<br>Announcers | Peer  | The logarithm of one plus the number of peer firms who have already disclosed their pay ratios before the focal firms' initial pay ratio disclosure date.                                            | DEF-14A                |

---

Table A.4: Addressing Potential Selection Effects

|                               | Compensation-and-Benefits |                   |                    |                    |                    |
|-------------------------------|---------------------------|-------------------|--------------------|--------------------|--------------------|
|                               | (1)                       | (2)               | (3)                | (4)                | (5)                |
| Post Disclosure               | 0.062**<br>(2.82)         | 0.062**<br>(2.18) | 0.063***<br>(3.01) | 0.054***<br>(3.20) | 0.049**<br>(2.43)  |
| Log Assets                    | 0.015<br>(0.20)           | 0.064<br>(0.94)   | 0.022<br>(0.30)    | 0.102*<br>(1.99)   | 0.094*<br>(2.02)   |
| Number of Segments            | -0.007<br>(-0.17)         | 0.012<br>(0.26)   | 0.008<br>(0.14)    | 0.023<br>(0.50)    | 0.021<br>(0.53)    |
| Intangible Asset              | -0.320<br>(-1.36)         | 0.010<br>(0.03)   | -0.279<br>(-1.13)  | -0.035<br>(-0.13)  | -0.299<br>(-1.33)  |
| Book to Market                | 0.069<br>(0.78)           | -0.056<br>(-0.64) | -0.014<br>(-0.17)  | 0.018<br>(0.37)    | 0.010<br>(0.16)    |
| Log Firm Age                  | -0.225<br>(-0.95)         | 0.124<br>(0.45)   | -0.032<br>(-0.13)  | 0.165<br>(0.55)    | -0.002<br>(-0.01)  |
| Log Analyst Coverage          | -0.020<br>(-0.24)         | 0.084<br>(0.88)   | 0.003<br>(0.03)    | 0.025<br>(0.52)    | -0.018<br>(-0.37)  |
| Institutional Shareholding    | 0.388*<br>(1.99)          | 0.107<br>(0.52)   | 0.594***<br>(3.18) | 0.171<br>(1.27)    | 0.277*<br>(1.92)   |
| Earnings Surprise             | 0.281<br>(1.37)           | 0.372<br>(1.39)   | 0.273<br>(1.46)    | 0.219<br>(1.03)    | 0.299*<br>(2.04)   |
| Cash Holding                  | -0.186<br>(-0.92)         | -0.163<br>(-0.80) | -0.137<br>(-0.68)  | -0.056<br>(-0.28)  | -0.250*<br>(-1.91) |
| Observations                  | 12,273                    | 8,763             | 12,790             | 14,499             | 18,260             |
| R-squared                     | 0.35                      | 0.36              | 0.35               | 0.35               | 0.34               |
| Firm FE                       | Yes                       | Yes               | Yes                | Yes                | Yes                |
| Year-Month FE                 | Yes                       | Yes               | Yes                | Yes                | Yes                |
| Exclude Manager-Level Ratings | No                        | No                | No                 | No                 | Yes                |

*Notes.* This table reports the robustness checks of excluding firms with high proportions of foreign employees and of excluding the ratings of high-paid employees. In Column (1), we exclude firms that report foreign segments based on the data from Compustat. In Column (2), we exclude firms whose foreign employees exceed domestic employees, based on the data from Orbis. In Column (3), we exclude firms whose foreign employees exceed domestic employees, based on the data from Revelio Labs. In Column (4), we exclude firms who voluntarily report that their median employees are in foreign countries. In Column (5), we only use the compensation-and-benefits ratings from non-manager employees. Variable definitions are provided in Table A.3 in the Internet Appendix. We double cluster standard errors by year-month and firm, and we report  $t$ -statistics in parentheses. Statistical significance is denoted by \*\*\*, \*\*, and \* for 1%, 5%, and 10%, respectively.

Table A.5: **Effect on Ratings Dispersion**

|                            | Compensation-and-Benefits<br>Dispersion |                      |
|----------------------------|-----------------------------------------|----------------------|
|                            | (1)                                     | (2)                  |
| Post Disclosure            | -0.033**<br>(-2.89)                     | -0.034***<br>(-2.90) |
| Log Assets                 |                                         | 0.041<br>(1.11)      |
| Number of Segments         |                                         | 0.030<br>(1.57)      |
| Intangible Asset           |                                         | -0.126<br>(-0.90)    |
| Book to Market             |                                         | 0.024<br>(0.66)      |
| Log Firm Age               |                                         | 0.072<br>(0.41)      |
| Log Analyst Coverage       |                                         | 0.070<br>(1.55)      |
| Institutional Shareholding |                                         | 0.088<br>(0.63)      |
| Earnings Surprise          |                                         | 0.204*<br>(1.97)     |
| Cash Holding               |                                         | -0.179<br>(-1.68)    |
| Observations               | 14,030                                  | 14,030               |
| R-squared                  | 0.18                                    | 0.18                 |
| Firm FE                    | Yes                                     | Yes                  |
| Year-Month FE              | Yes                                     | Yes                  |

*Notes.* This table presents the results of regressing Compensation-and-Benefits ratings dispersion, defined as the standard deviation in a firm's ratings in a given month, on the indicator variable *Post Disclosure*, which equals one in the month that the firm discloses its initial CEO pay ratio and each subsequent month, and equals zero in the months before the disclosure. Column (1) reports the basic regression following our main difference-in-differences research design without control variables, whereas Column (2) reports the regression results of the fully controlled model. Variable definitions are provided in Table A.3 in the Internet Appendix. We double cluster standard errors by year-month and firm, and we report *t*-statistics in parentheses. Statistical significance is denoted by \*\*\*, \*\*, and \* for 1%, 5%, and 10%, respectively.

Table A.6: **Additional Robustness Tests**

|                                                       | Compensation-and-Benefits |                    |                    |                   |                    |
|-------------------------------------------------------|---------------------------|--------------------|--------------------|-------------------|--------------------|
|                                                       | (1)                       | (2)                | (3)                | (4)               | (5)                |
| Post Disclosure                                       | 0.064***<br>(6.10)        | 0.062***<br>(4.59) | 0.048**<br>(2.59)  | 0.042*<br>(1.92)  | 0.053**<br>(2.14)  |
| Log Assets                                            | 0.042<br>(0.84)           | 0.055<br>(1.09)    | 0.082<br>(1.58)    | 0.066<br>(1.21)   | 0.072<br>(1.34)    |
| Number of Segments                                    | 0.019<br>(0.92)           | 0.002<br>(0.06)    | 0.022<br>(0.58)    | 0.010<br>(0.26)   | 0.040<br>(0.99)    |
| Intangible Asset                                      | -0.013<br>(-0.08)         | -0.147<br>(-0.72)  | -0.173<br>(-0.72)  | -0.238<br>(-0.99) | -0.111<br>(-0.46)  |
| Book to Market                                        | -0.021<br>(-0.68)         | -0.010<br>(-0.21)  | 0.023<br>(0.40)    | 0.045<br>(0.78)   | 0.025<br>(0.36)    |
| Log Firm Age                                          | 0.072<br>(0.61)           | 0.005<br>(0.02)    | 0.077<br>(0.36)    | 0.062<br>(0.30)   | -0.054<br>(-0.20)  |
| Log Analyst Coverage                                  | 0.014<br>(0.35)           | -0.020<br>(-0.45)  | 0.037<br>(0.85)    | 0.020<br>(0.43)   | -0.034<br>(-0.60)  |
| Institutional Shareholding                            | 0.202*<br>(2.02)          | 0.160<br>(1.65)    | 0.219<br>(1.74)    | 0.124<br>(0.98)   | 0.174<br>(1.35)    |
| Earnings Surprise                                     | 0.188<br>(1.54)           | 0.268<br>(1.64)    | 0.314*<br>(2.05)   | 0.295*<br>(1.94)  | 0.260<br>(1.60)    |
| Cash Holding                                          | -0.134<br>(-1.16)         | -0.103<br>(-0.82)  | -0.229<br>(-1.56)  | -0.173<br>(-1.18) | -0.309*<br>(-1.74) |
| Abnormal Five-star Reviews                            |                           |                    | 0.008***<br>(3.24) |                   |                    |
| Median Employee Pay Increase $\times$ Post Disclosure |                           |                    |                    |                   | 0.015<br>(0.75)    |
| Observations                                          | 17,024                    | 17,599             | 18,375             | 18,410            | 16,419             |
| R-squared                                             | 0.53                      | 0.40               | 0.35               | 0.34              | 0.34               |
| Firm FE                                               | Yes                       | Yes                | Yes                | Yes               | Yes                |
| Year-Month FE                                         | Yes                       | Yes                | Yes                | Yes               | Yes                |

*Notes.* This table reports the results from additional robustness tests. In Columns (1) and (2), we re-estimate our main specification after removing overly influential observations identified based on Cook’s D and Standardized DFBetas, respectively. In Column (3), we re-estimate our main specification when controlling for the measure of abnormal five-star reviews proposed by [Gong and Thomas \(2023\)](#). The principle behind their measure is to regress the annual numbers of five-star reviews on firm fundamentals and use the residual to capture the “abnormal” number of five-star reviews. In Column (4), we repeat our main analysis with Glassdoor ratings excluding the ones with the highest scores for all dimensions. In Column (5), we interact *Post Disclosure* with *Median Employee Pay Increase*, which is defined as one if the increase in median employee pay between the first and second years of the disclosure surpasses the inflation rate, and zero otherwise. Variable definitions are provided in Table A.3 in the Internet Appendix. We double cluster standard errors by year-month and firm, and we report *t*-statistics in parentheses. Statistical significance is denoted by \*\*\*, \*\*, and \* for 1%, 5%, and 10%, respectively.
